# Supplementary material for: In their own words: The impact of subtle language and communication difficulties as described by autistic girls and boys without intellectual disability
Source: PubMed Central journal article supplement — Autism. 2021 Jul 22;26(2):332–45. doi: 10.1177/13623613211002047 (PMC8814951; doi:10.1177/13623613211002047), 2021-07-22
Supplement: sj-pdf-1-aut-10.1177_13623613211002047.pdf [file sj-pdf-1-aut-10.1177_13623613211002047.pdf]

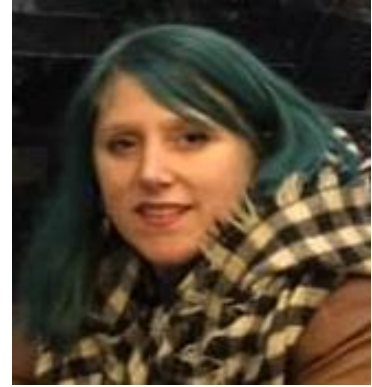

**Alexandra Sturrock**

## **Talking about *your* communication**

**This booklet is to help us talk about your communication**

**It is so you can read and think about your answers**

**I will ask you to talk about each question**

**We will use the book to talk about things like:**

- **Speaking**
- **Language**
- **Reading**
- **Writing**
- **Storytelling**
- **Friends**

1. How easy or difficult do you find it talking and listening to people?



Do you think you know a lot of long words? Do you ever forget words that you do know really?

Do you find it easy or difficult to talk in sentences?

Do you find it easy or difficult to listen to others?

Do you think people understand what you mean when you talk?  
Or do they ask you to explain all over again?

2. How easy or difficult do you find it to use writing or typing?

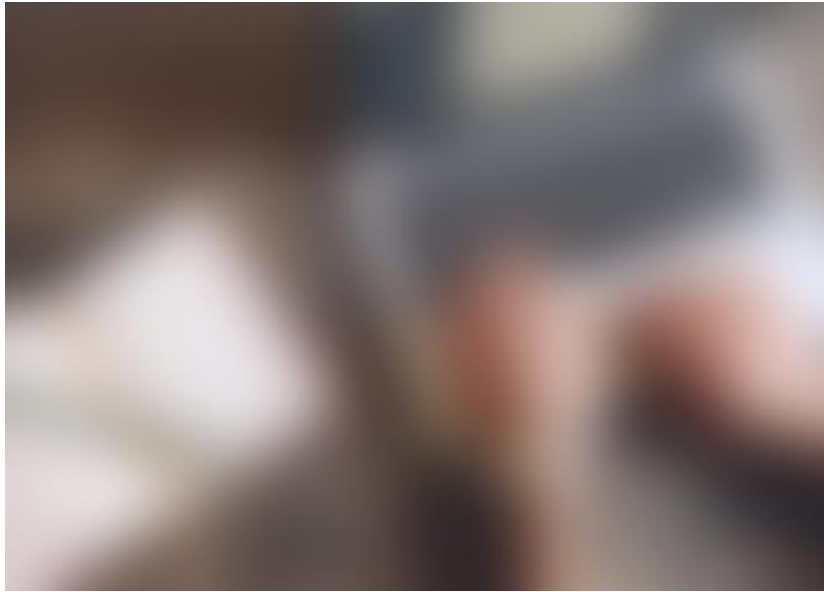

How easy or difficult do you find it to write with a pen and paper?

How easy or difficult do you find it to type using a computer or android device?

What sort of things do you write?

Do you like reading?

What do you like to read?

3. What would happen if you were asked to remember and carry out some instructions?

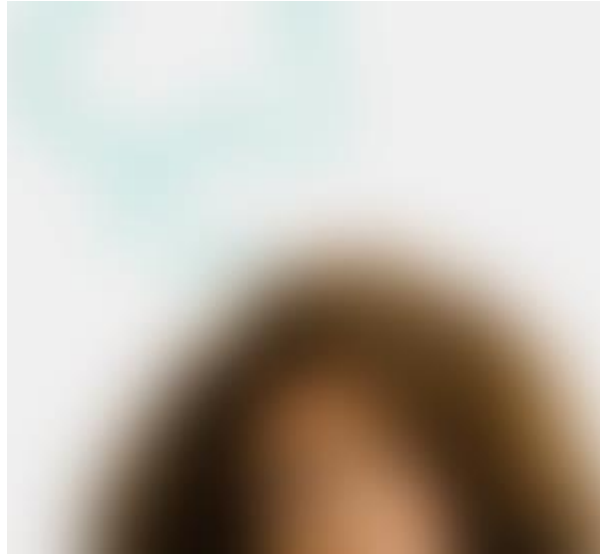

Would you find it easy or would you forget some things?

Do you get confused if you are asked to remember lots of things (3 things)?

Do you ever get told off for forgetting important things?

Do you ever get cross with yourself for forgetting important things?

#### 4. Do you like chatting to people?

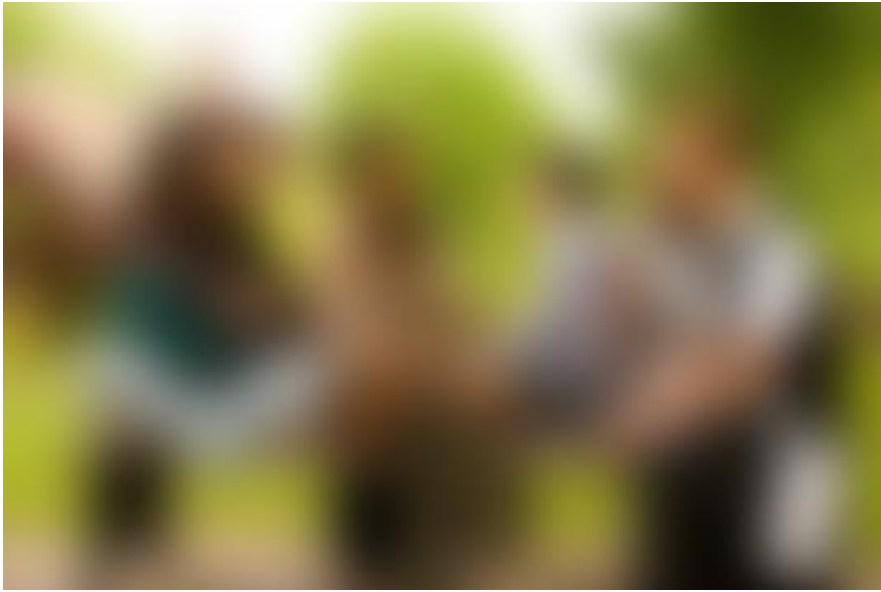

Is this something you find easy or difficult?

What do you like to chat about?

Do you think other people like chatting with you?

5. Do you have friends who are the same age as you? Or are they older or younger?

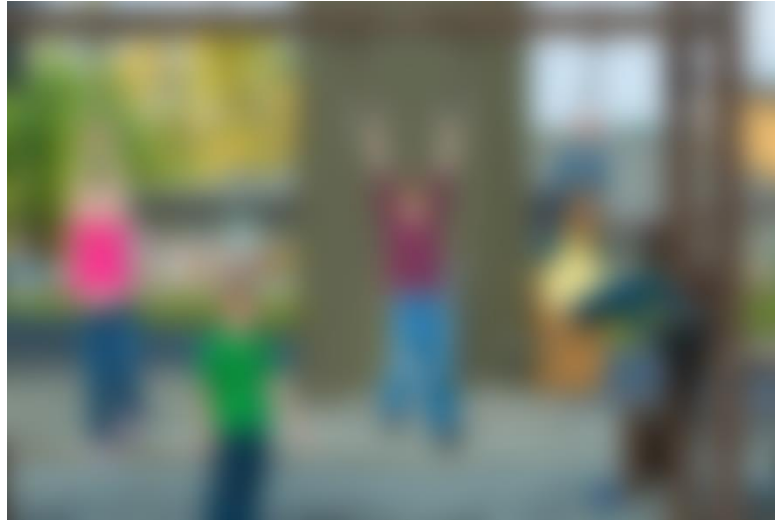

Do you mostly like talking to adults?

Why is that, do you know?

## 6. Meeting people the same age as you and making new friends

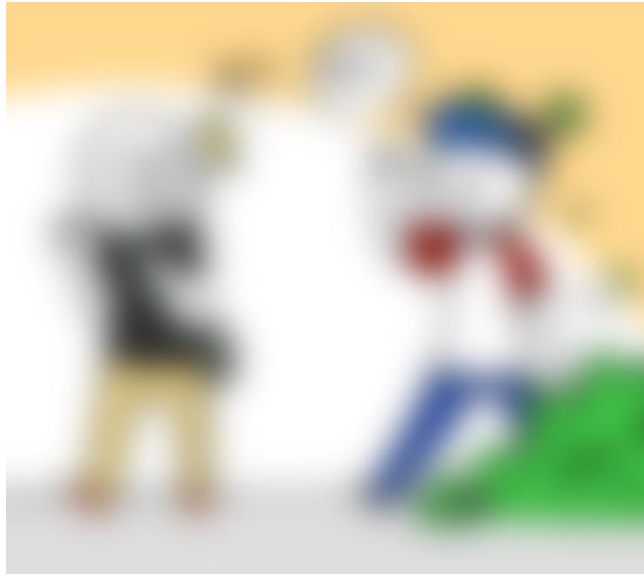

Can you talk to new people of the same age as you?

Is it easy or difficult to talk to a new person the same age as you?

Would you be happy to ask them to play?

Would you prefer to hang out with someone new but not chat?

7. How easy or difficult do you find it to talk in groups of people?

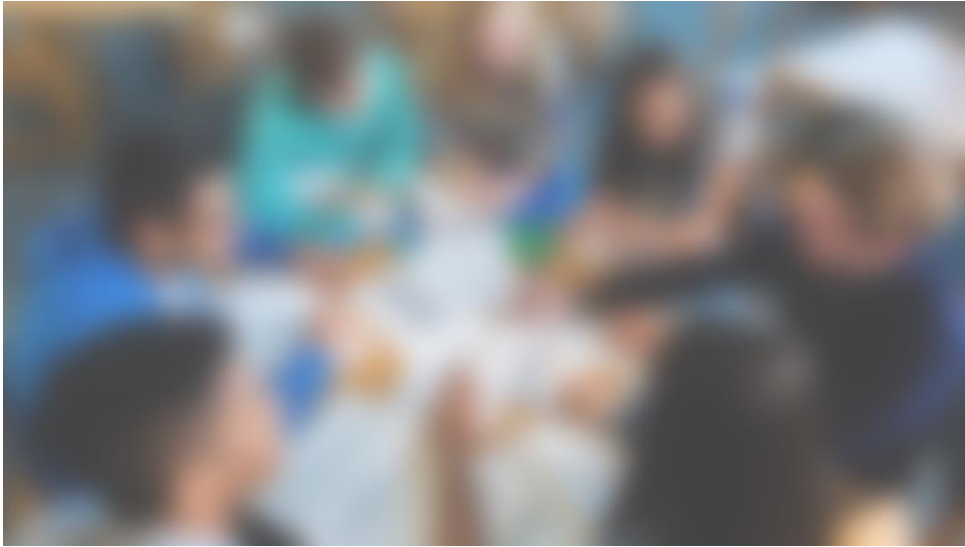

Do you get confused when too many people talk at once?

Do you enjoy talking in a large group of people (5-6 people)?

Can you talk in class activities?



8. Would you find it easy or difficult to tell me a story about what happened last time you went on a day trip?

Could you tell me that story now?

Can you explain when something goes wrong?

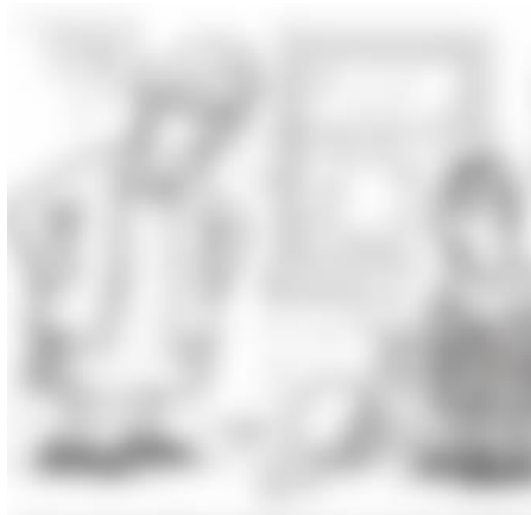

9. What games do you play with your friends?

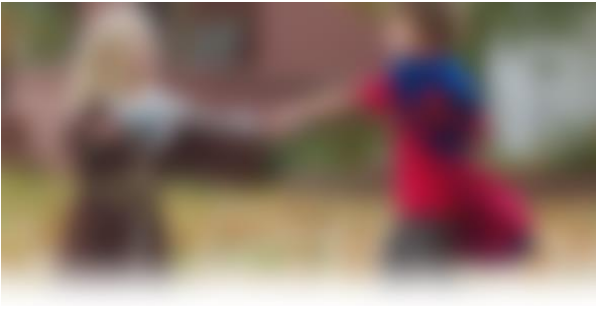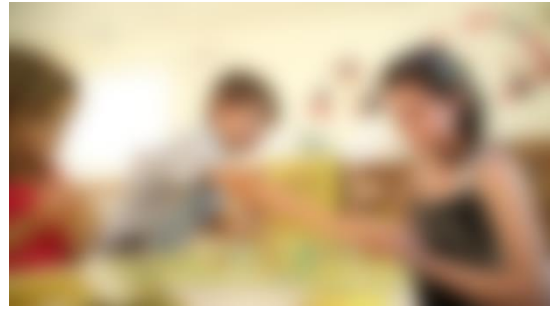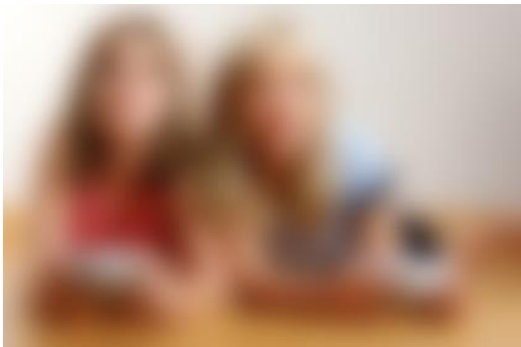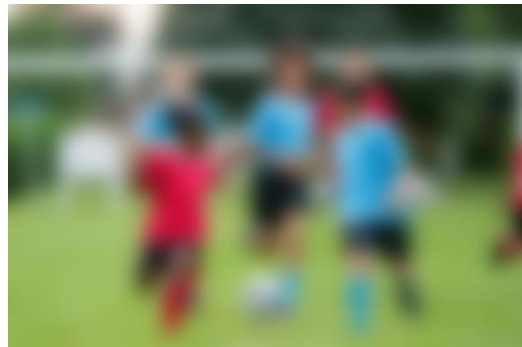

What games do you play when you are on your own?

Do you think the games you like to play are the same or different to most people in your class?

10. Is there anything that makes it *difficult for you* to *make new friends*?

Is there anything that makes it difficult for you *to keep* the friends you have?

11. Do you find it easy or difficult to explain your thoughts to other people?

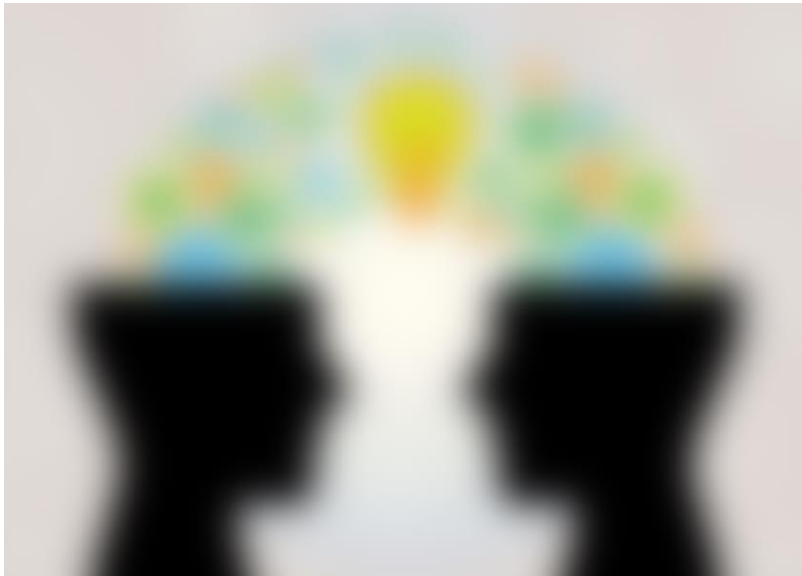

Has this ever happened to you?

Can you tell me what happened?

Do you know what you were feeling at the time?

Can you describe that feeling to me?

12. Do you find it easy or difficult to explain your feelings to other people?

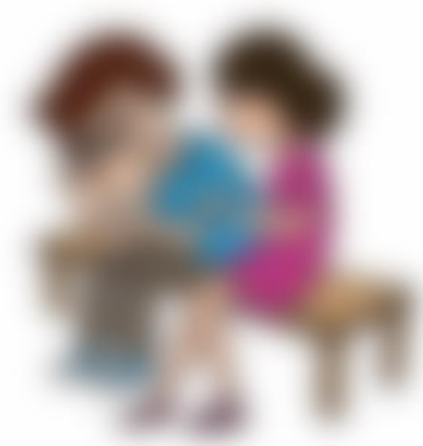

Has this ever happened to you?

Can you tell me what happened?

Do you know what you were feeling at the time?

Can you describe that feeling to me?

13. Would you like to add anything about  
Language and communication

making friends

how this affects how you feel

or what you do ?

14. Would you like to add anything else?

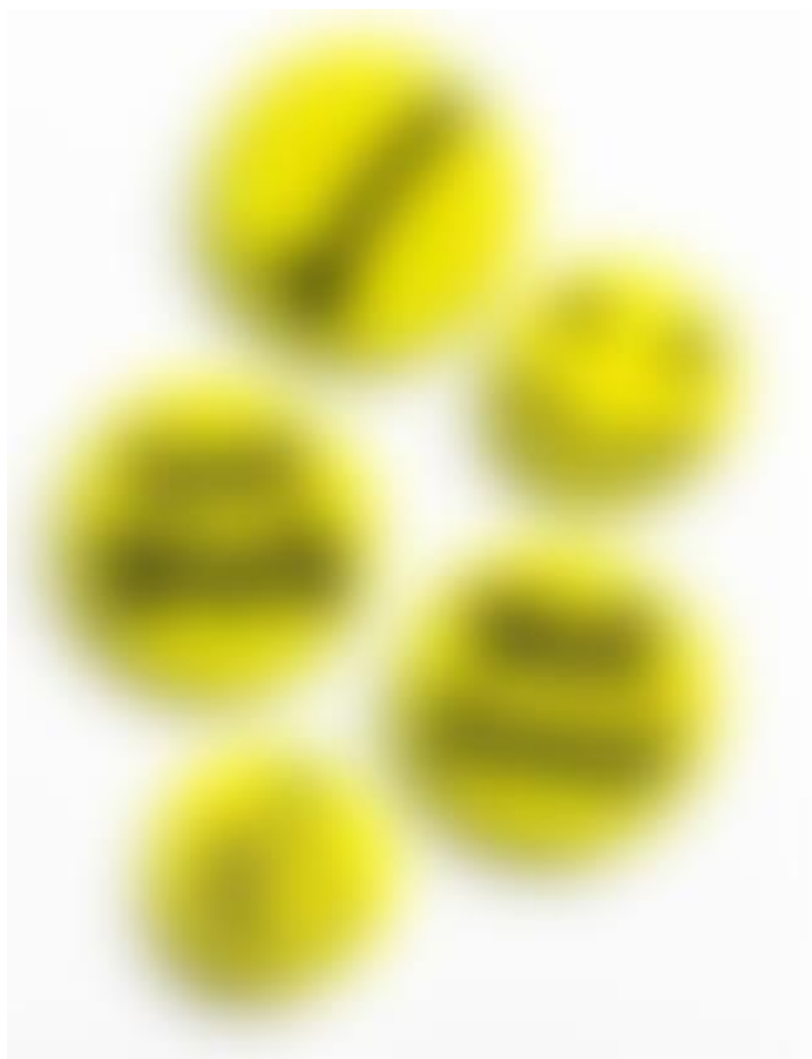

You've finished!

Thank you!!!!
